# Supplementary material for: Effects of Myeloperoxidase-Induced Oxidation on Antiatherogenic Functions of High-Density Lipoprotein
Source: Hindawi journal article supplement (doi:10.1155/2015/592594), 2015-01-01

Supplement Figure 1

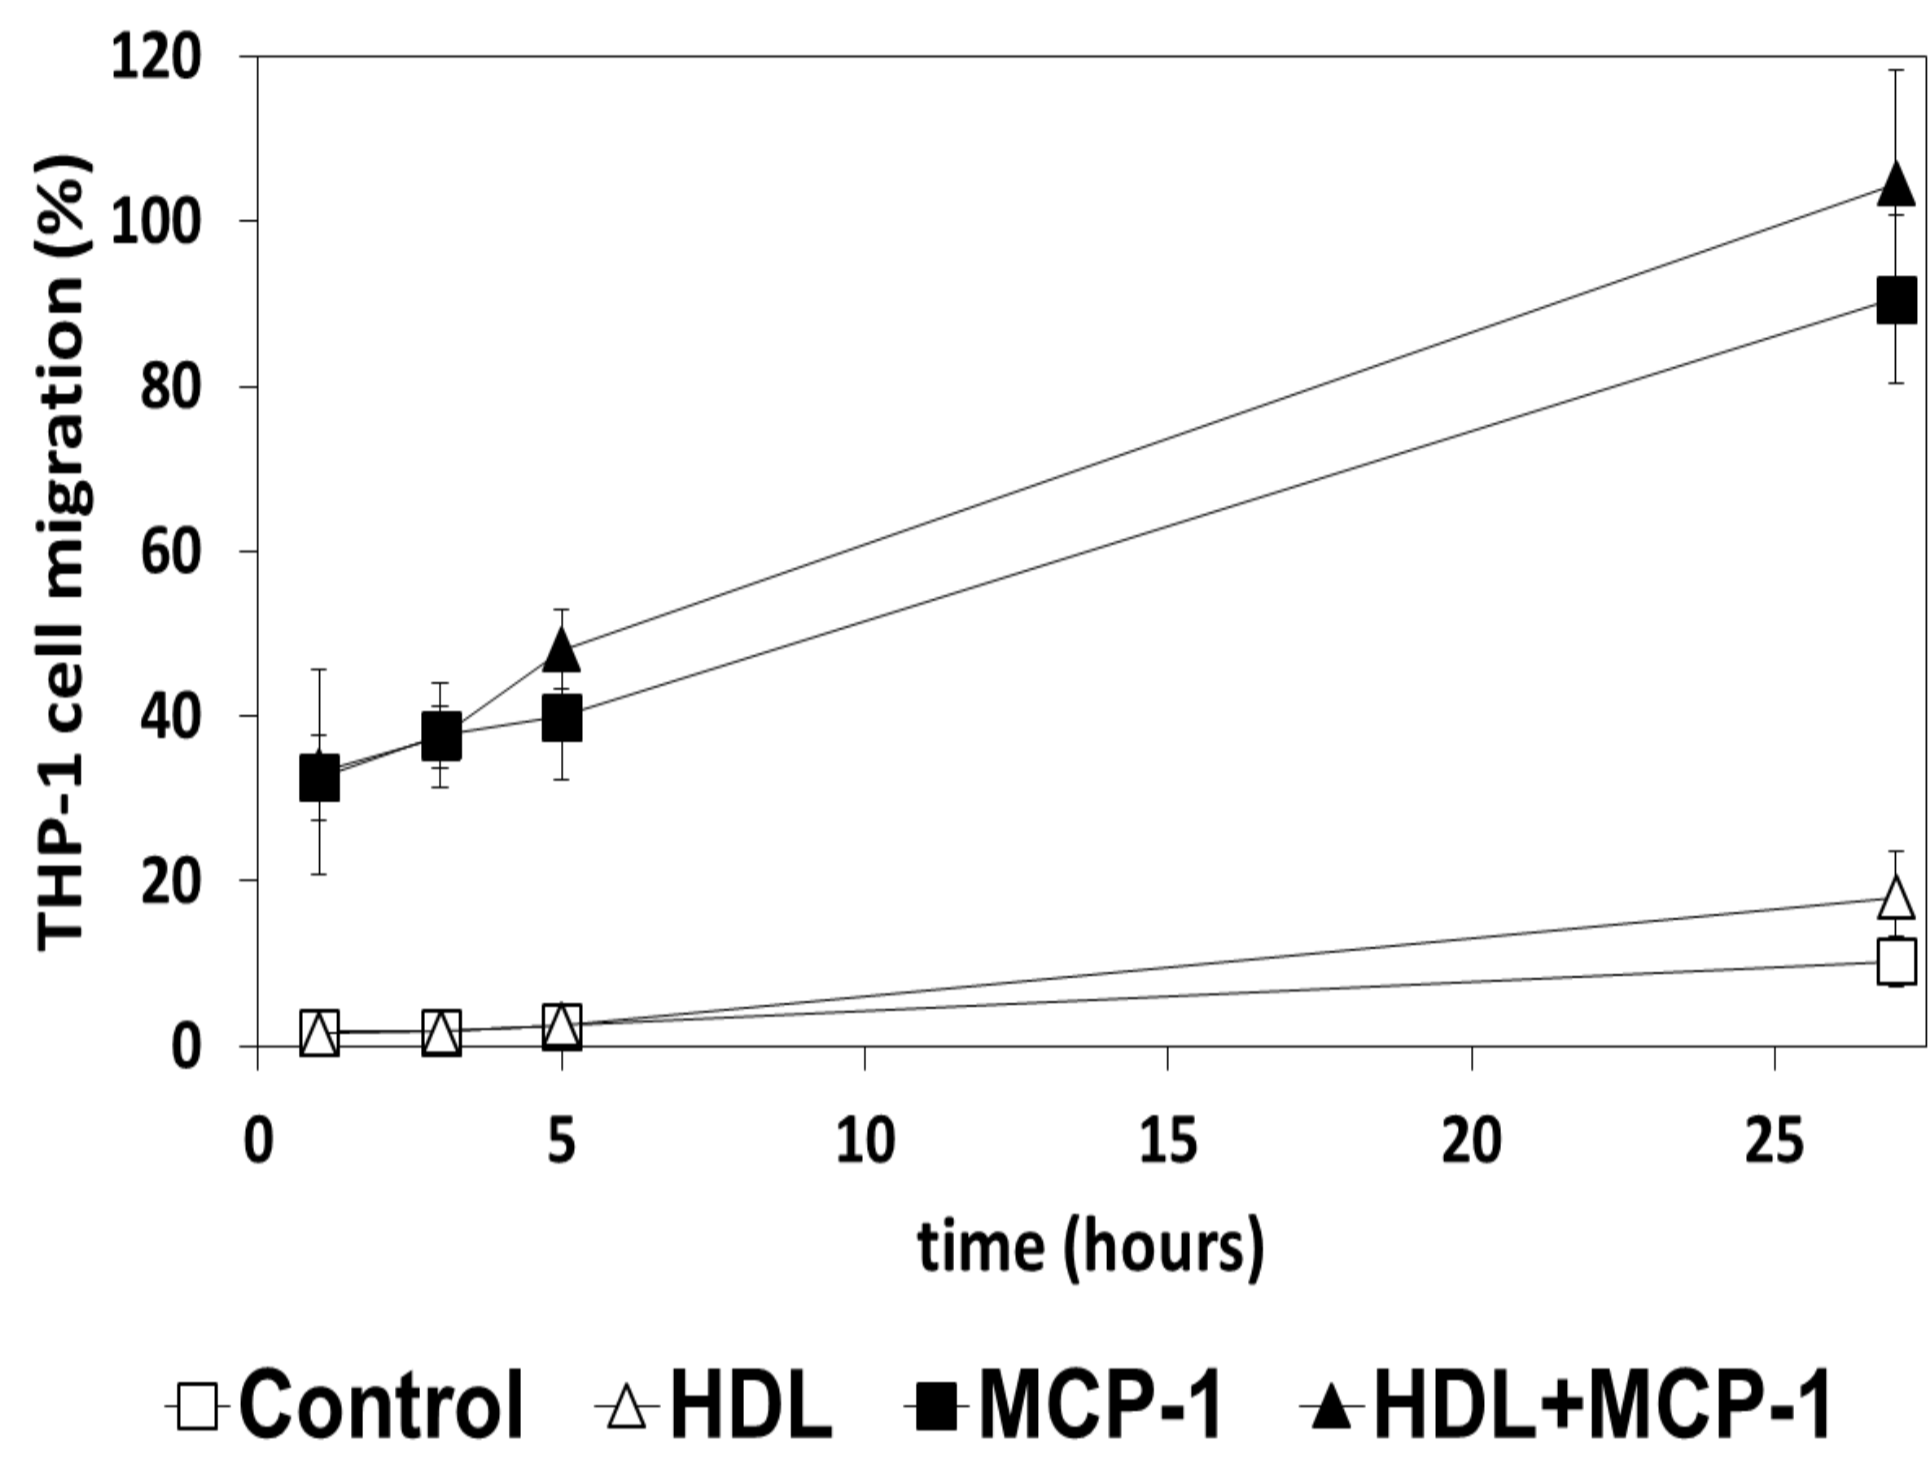

Supplement: f1 [file 592594.f1.pdf]
